# Supplementary material for: Functional clustering of B cell receptors using sequence and structural features
Source: Royal Society of Chemistry journal article supplement (doi:10.1039/c9me00021f), 2019-01-01
Supplement: c9me00021f1.pdf [file c9me00021f1.pdf]

| Clusters | Total number of PDBs | PDBs code                                                                                                                                                                                    |
|----------|----------------------|----------------------------------------------------------------------------------------------------------------------------------------------------------------------------------------------|
| 1        | 27                   | 3se8HL,3se9HL,4j6rHL,4jb9HL,4jdtHL,4jpvHL,4jpwHL,4lsuHL,4olzHL,4rx4AD,4s1qHL,4s1rHL,4s1sHL,4xmpHL,4xnyHL,4xnzHL,4xvtHL,4ydiHL,4ydIBC,4yflHL,5cd5CD,5f96HL,5f9oHL,5f9wBC,5fecAB,5i9qBC,5te7HL |
| 2        | 4                    | 1deeFE,1xf5BA,1yntBA,4ioiBA                                                                                                                                                                  |
| 3        | 4                    | 5u3jHL,5u3IHL,5u3nHL,5u3oHL                                                                                                                                                                  |
| 4        | 3                    | 1ahwBA,1jpsHL,1uj3BA                                                                                                                                                                         |
| 5        | 3                    | 1yy9DC,3b2uCD,5sx5HL                                                                                                                                                                         |
| 6        | 3                    | 2b1hHL,3mlrHL,3mlwHL                                                                                                                                                                         |
| 7        | 3                    | 3baeHL,3iflHL,3ifoAB                                                                                                                                                                         |
| 8        | 3                    | 4tvpHL,5cezHL,5t3zHL                                                                                                                                                                         |
| 9        | 2                    | 1a2yBA,1bvkBA                                                                                                                                                                                |
| 10       | 2                    | 1eo8HL,1qfuHL                                                                                                                                                                                |
| 11       | 2                    | 1frgHL,1ifhHL                                                                                                                                                                                |
| 12       | 2                    | 1ggiHL,4jo1IM                                                                                                                                                                                |
| 13       | 2                    | 1kc5HL,1kcsHL                                                                                                                                                                                |
| 14       | 2                    | 1p2cBA,1yqvHL                                                                                                                                                                                |
| 15       | 2                    | 1sy6HL,1xiwHG                                                                                                                                                                                |
| 16       | 2                    | 1tziBA,4zffHL                                                                                                                                                                                |
| 17       | 2                    | 2aepHL,2aeqHL                                                                                                                                                                                |
| 18       | 2                    | 2eizBA,3d9aHL                                                                                                                                                                                |
| 19       | 2                    | 2i9IHG,4u6hAB                                                                                                                                                                                |
| 20       | 2                    | 2oslHL,3bkyHL                                                                                                                                                                                |
| 21       | 2                    | 2xraHL,3ma9HL                                                                                                                                                                                |
| 22       | 2                    | 3bn9DC,3so3CB                                                                                                                                                                                |
| 23       | 2                    | 3effDC,3psBA                                                                                                                                                                                 |
| 24       | 2                    | 3eyfBA,4hhaBA                                                                                                                                                                                |
| 25       | 2                    | 3gbnHL,4fqihHL                                                                                                                                                                               |
| 26       | 2                    | 3l5wHL,3l5xHL                                                                                                                                                                                |
| 27       | 2                    | 3u2sAB,4dgoHL                                                                                                                                                                                |
| 28       | 2                    | 3ujiHL,3ujjHL                                                                                                                                                                                |
| 29       | 2                    | 4al8HL,4bz1HL                                                                                                                                                                                |
| 30       | 2                    | 4edwHL,4edxBA                                                                                                                                                                                |
| 31       | 2                    | 4hxxAB,5ugyHL                                                                                                                                                                                |
| 32       | 2                    | 4hlzGH,4py8IJ                                                                                                                                                                                |
| 33       | 2                    | 4hs6HL,4hs8HL                                                                                                                                                                                |
| 34       | 2                    | 4jpkHL,5iesHL                                                                                                                                                                                |
| 35       | 2                    | 4jznIP,4z0xBA                                                                                                                                                                                |
| 36       | 2                    | 4kvnHL,5k9oAB                                                                                                                                                                                |
| 37       | 2                    | 4lqfHL,4lu5IM                                                                                                                                                                                |
| 38       | 2                    | 4ojfHL,4onfHL                                                                                                                                                                                |
| 39       | 2                    | 4r8wHL,5kaqQR                                                                                                                                                                                |
| 40       | 2                    | 4ut6HL,5lcvHL                                                                                                                                                                                |
| 41       | 2                    | 4utaHL,5h37KL                                                                                                                                                                                |
| 42       | 2                    | 4y5vGH,4y5yAB                                                                                                                                                                                |
| 43       | 2                    | 4ydvHL,5drzBA                                                                                                                                                                                |
| 44       | 2                    | 4zs6CD,5do2HL                                                                                                                                                                                |
| 45       | 2                    | 5d1qBA,5d1xBA                                                                                                                                                                                |
| 46       | 2                    | 5esvHL,5eszAB                                                                                                                                                                                |
| 47       | 2                    | 5f3bAB,5f3hAB                                                                                                                                                                                |
| 48       | 2                    | 5fgbCA,5fgcEB                                                                                                                                                                                |
| 49       | 2                    | 5jw3HL,5k9kHL                                                                                                                                                                                |
| 50       | 2                    | 5kveHL,5kvfHL                                                                                                                                                                                |
| 51       | 2                    | 5tljDC,5tlkHG                                                                                                                                                                                |
| 52       | 2                    | 5vicHL,5vigAB                                                                                                                                                                                |

Suppl Table 1.

# Tree representation of hierarchical clusters

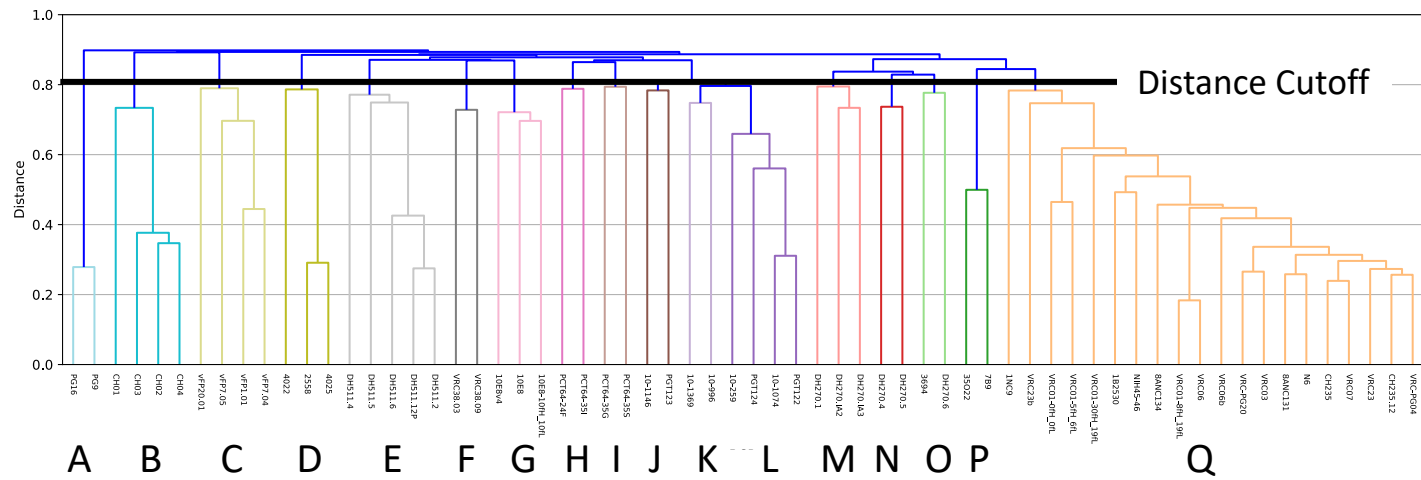

# Network representation of clusters

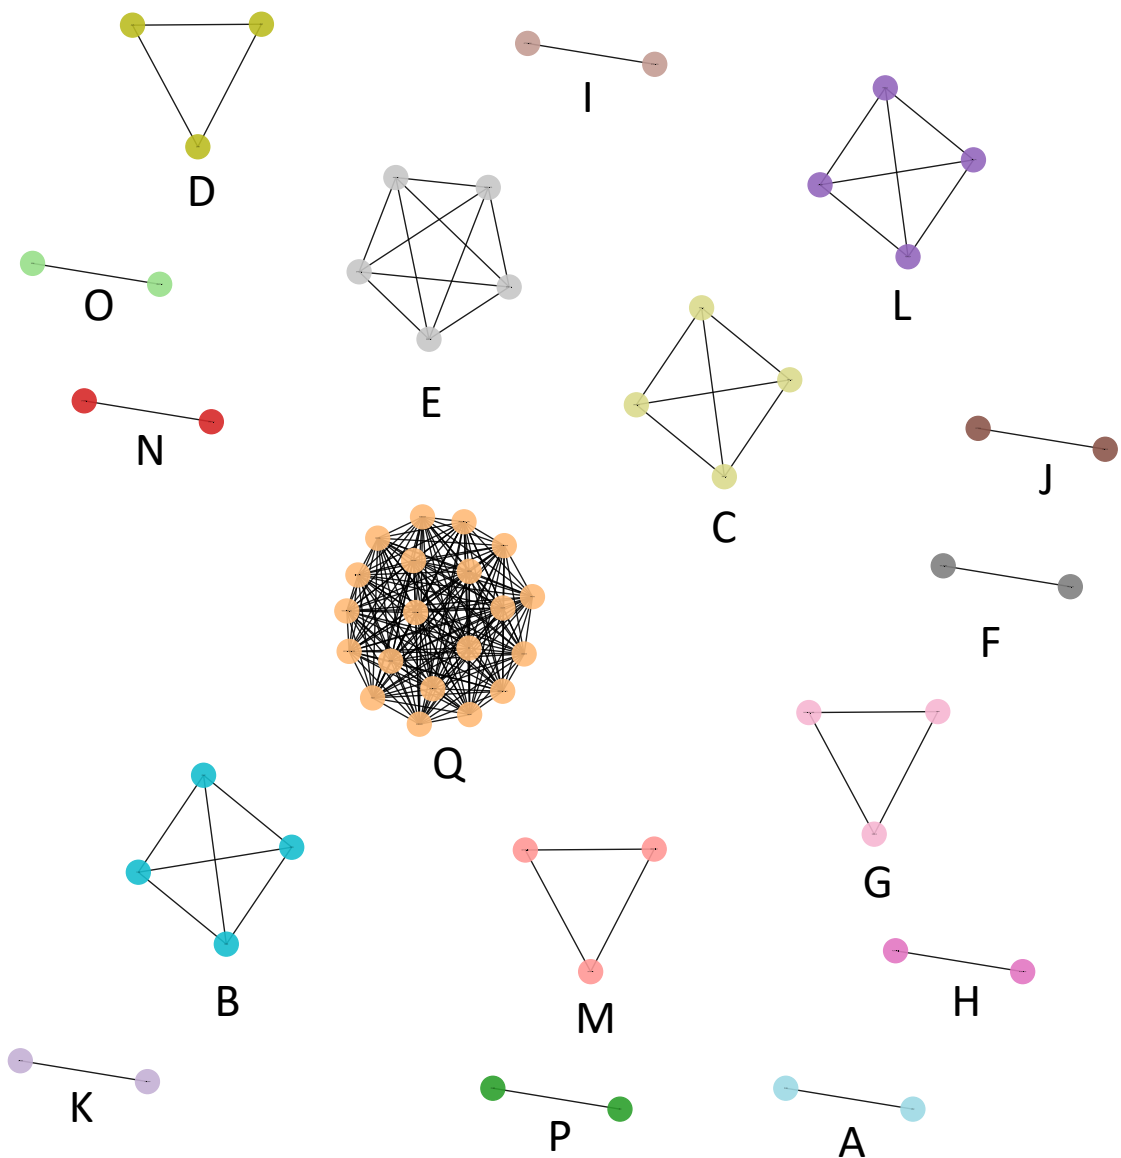

**Suppl Fig. 1. Relationship between hierarchical clusters and networks.** The Tree was sliced at a cutoff distance (0.796) and clusters were displayed as networks with edge-lengths proportional to their node distance.

**A**

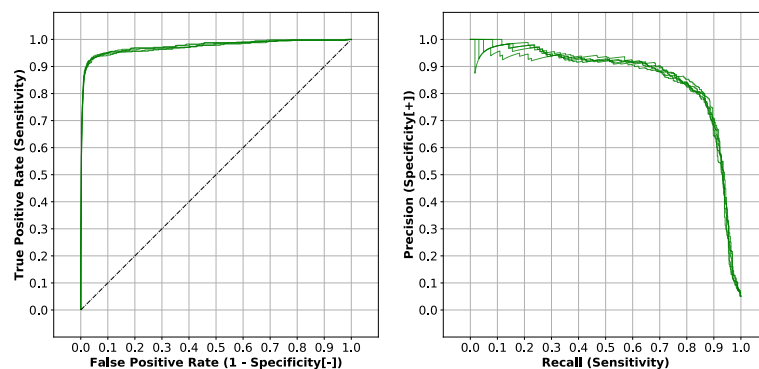

**B**

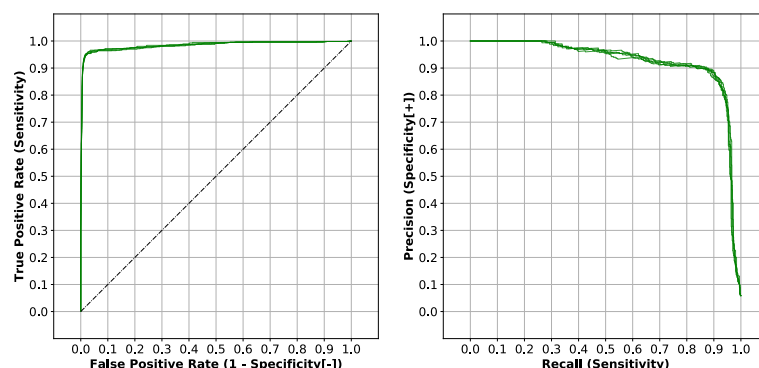

**C**

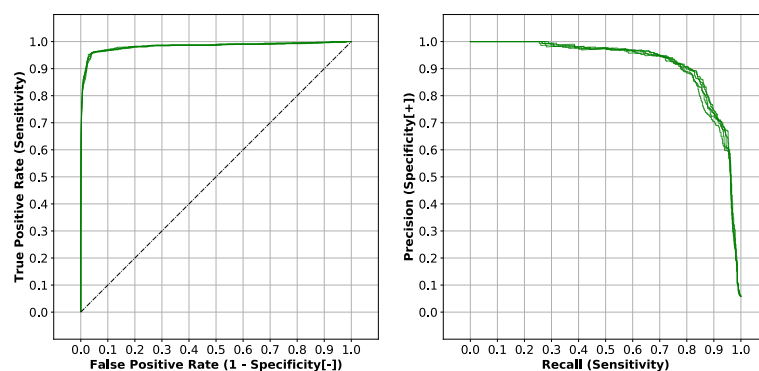

**D**

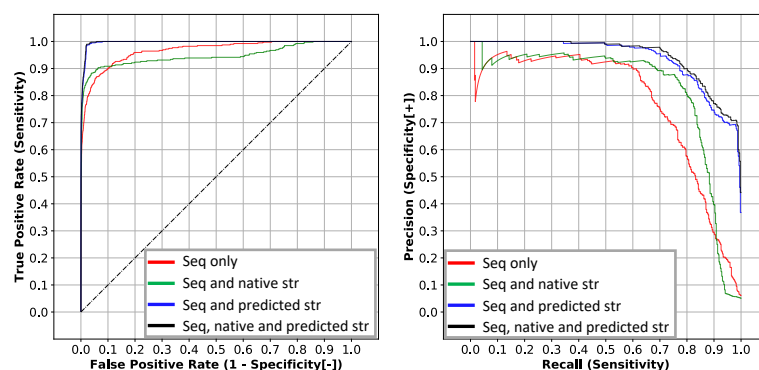

**Suppl Fig. 2. Comparison of SVM models.** The ROC and Precision-Recall curves for 5-fold cross-validation using sequence only (A), sequence and native structure (B) and sequence and predicted structures (C). The various SVMs, were also tested using Repertoire Builder models built with a template sequence identity blacklist of 80% (D).

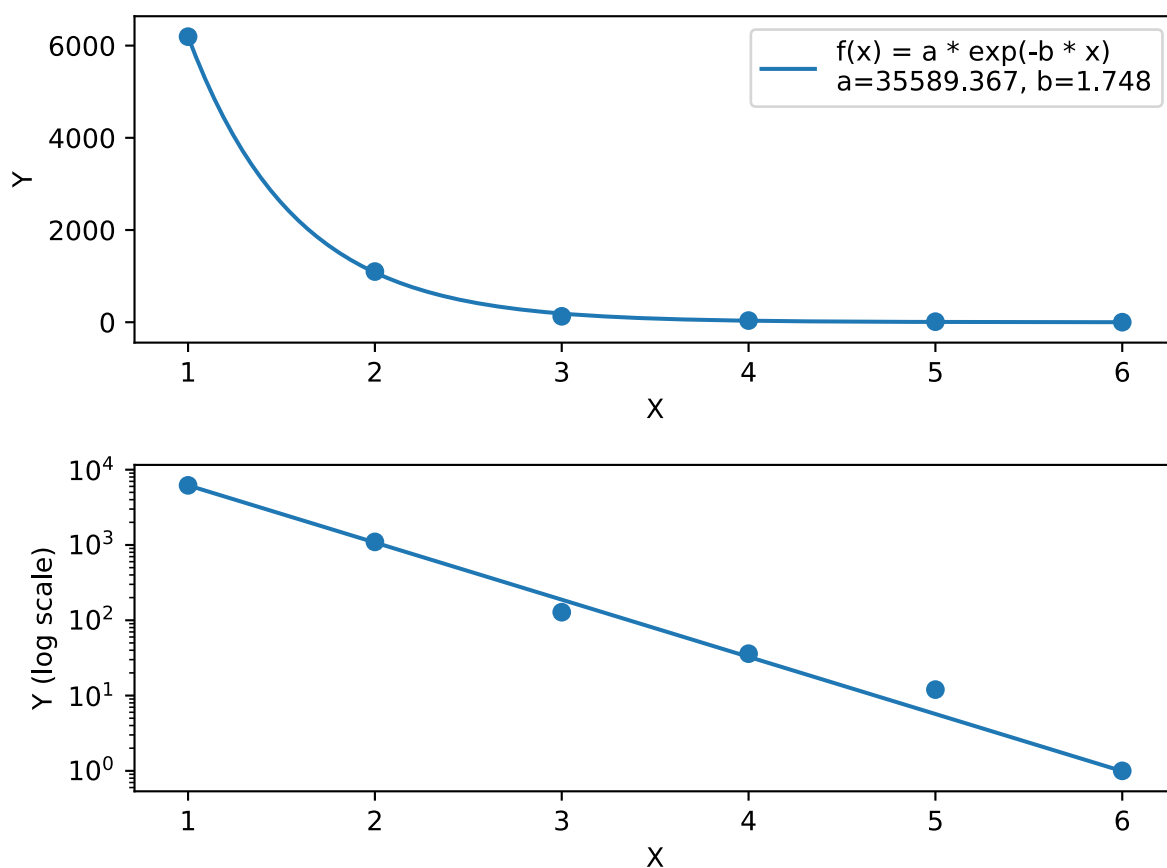

**Suppl Fig. 3. Human BCR cluster size dependence.** The best fit for distribution (Y) of cluster size (X) for the human BCR data was obtained by an exponential function.

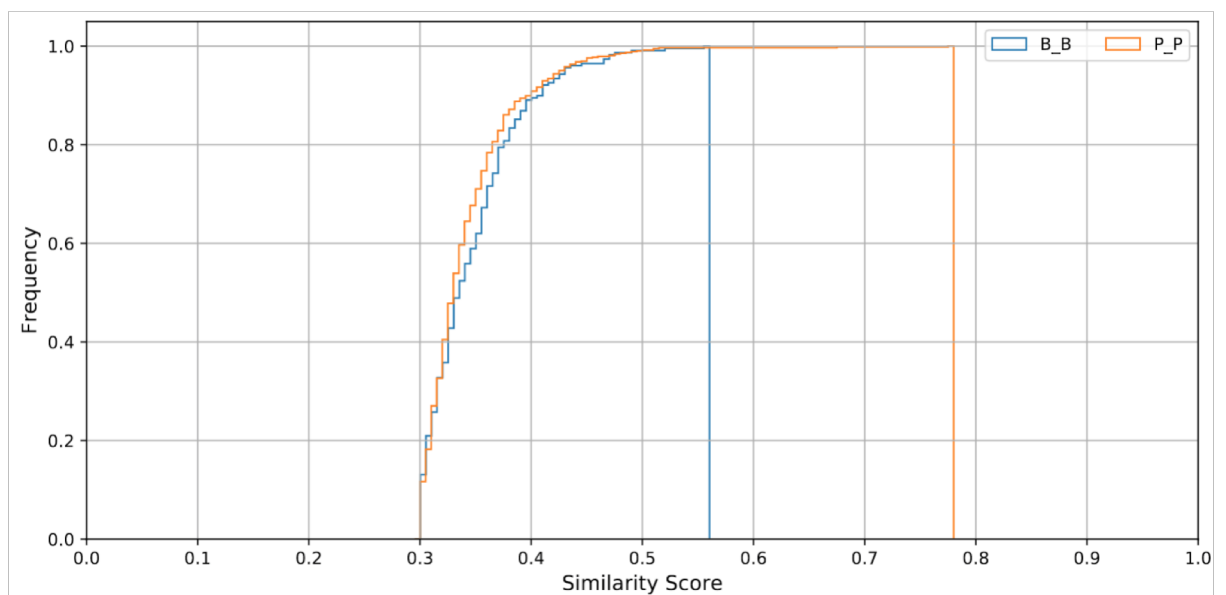

**Suppl Fig. 4. Cumulative distribution of human BCR similarity scores.** The plot shows cumulative distributions for BCR similarity scores of pairs of plasmablasts (P\_P) and pairs of B cells (B\_B). Vertical lines indicate the maximum similarity observed.

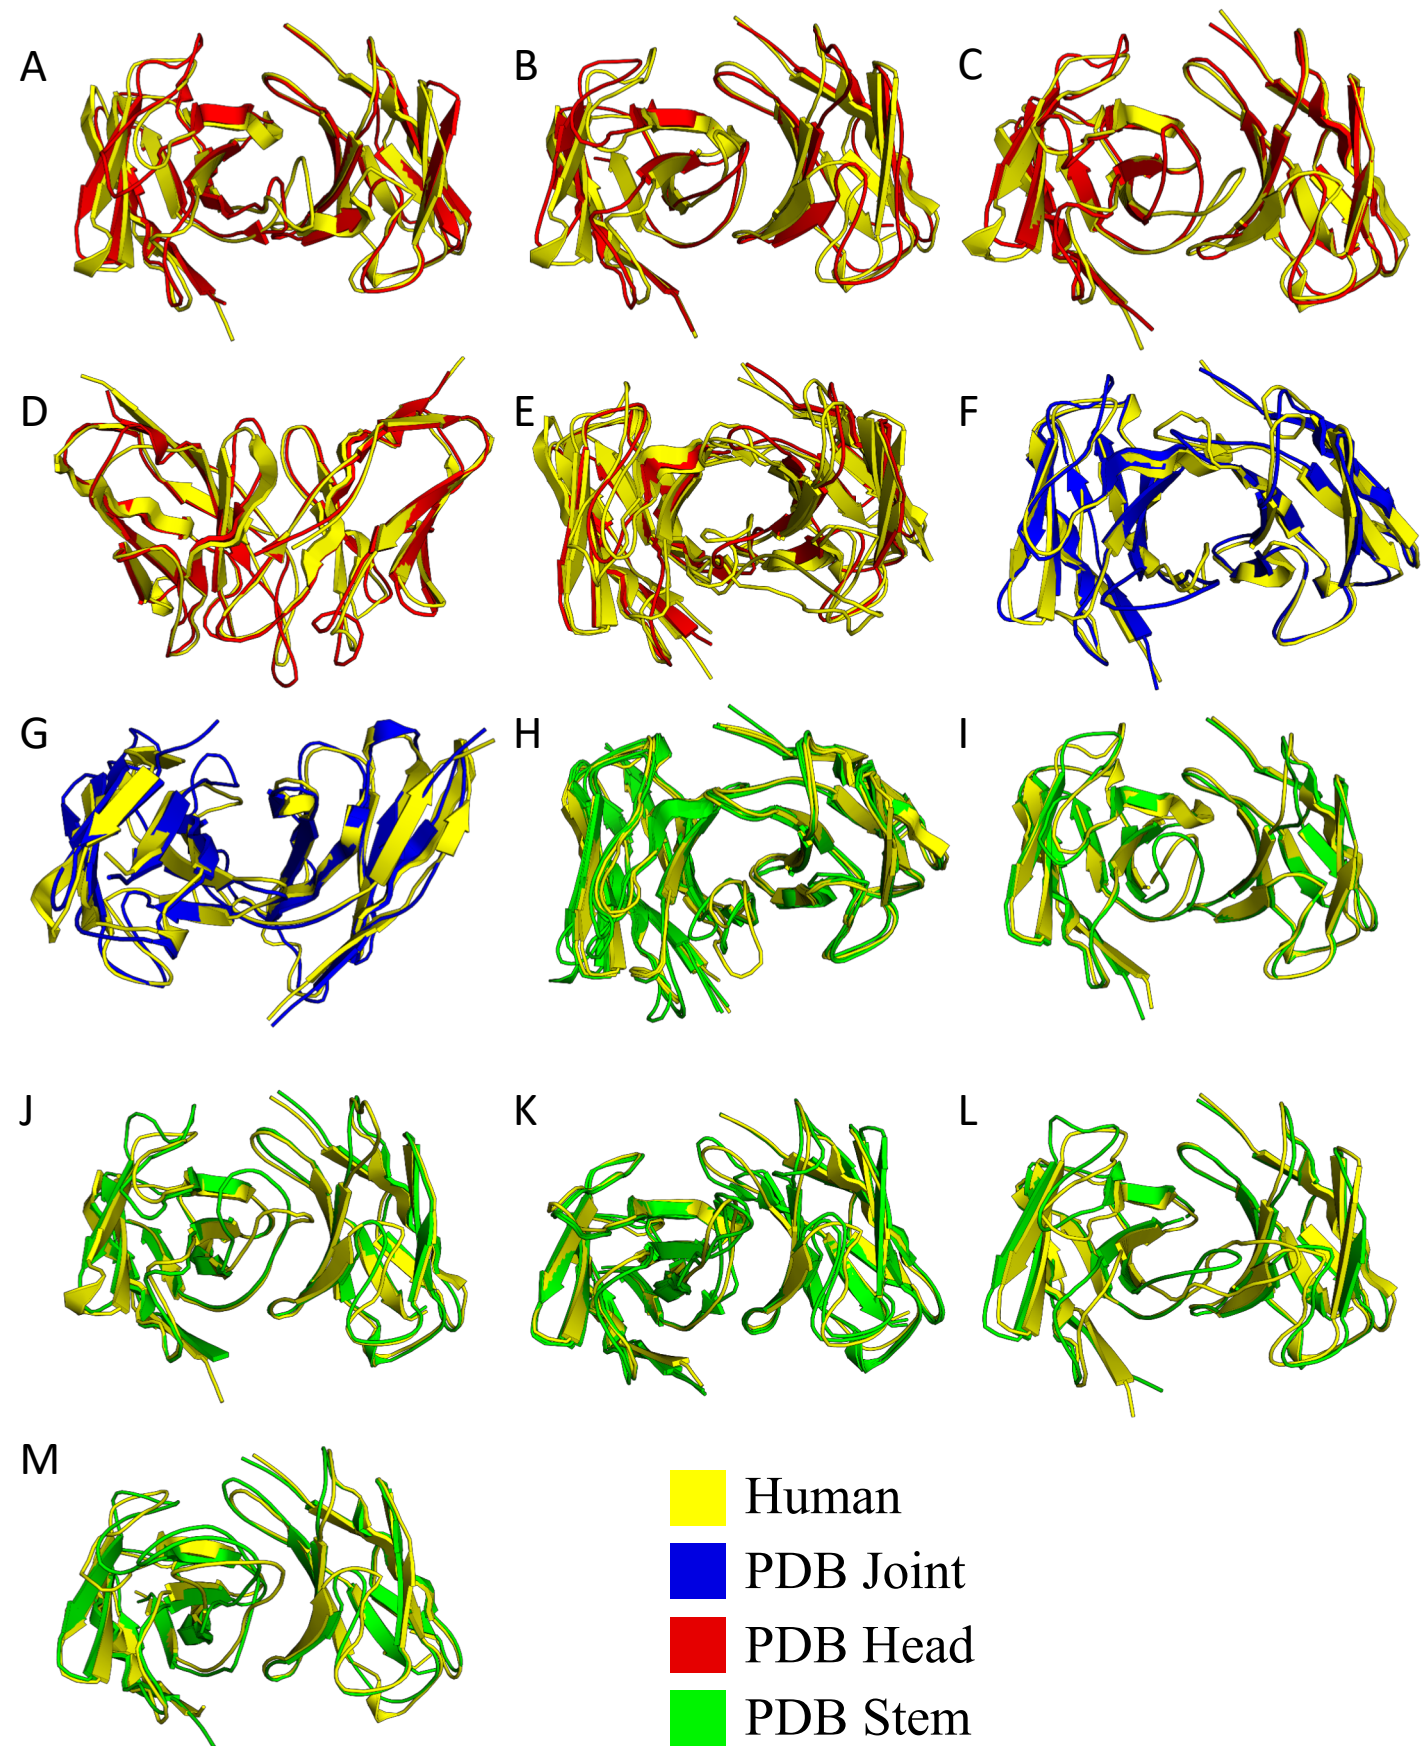

**Suppl Fig. 5. Visualization of structures of clusters containing human and known anti-HA PDB entries.** The label of each illustration corresponds with the label of the cluster in Fig.5. The structures of PDB entries were characterized by their HA-binding modes as head (red), joint (blue) or stem (green). The structures of human BCRs were colored yellow.

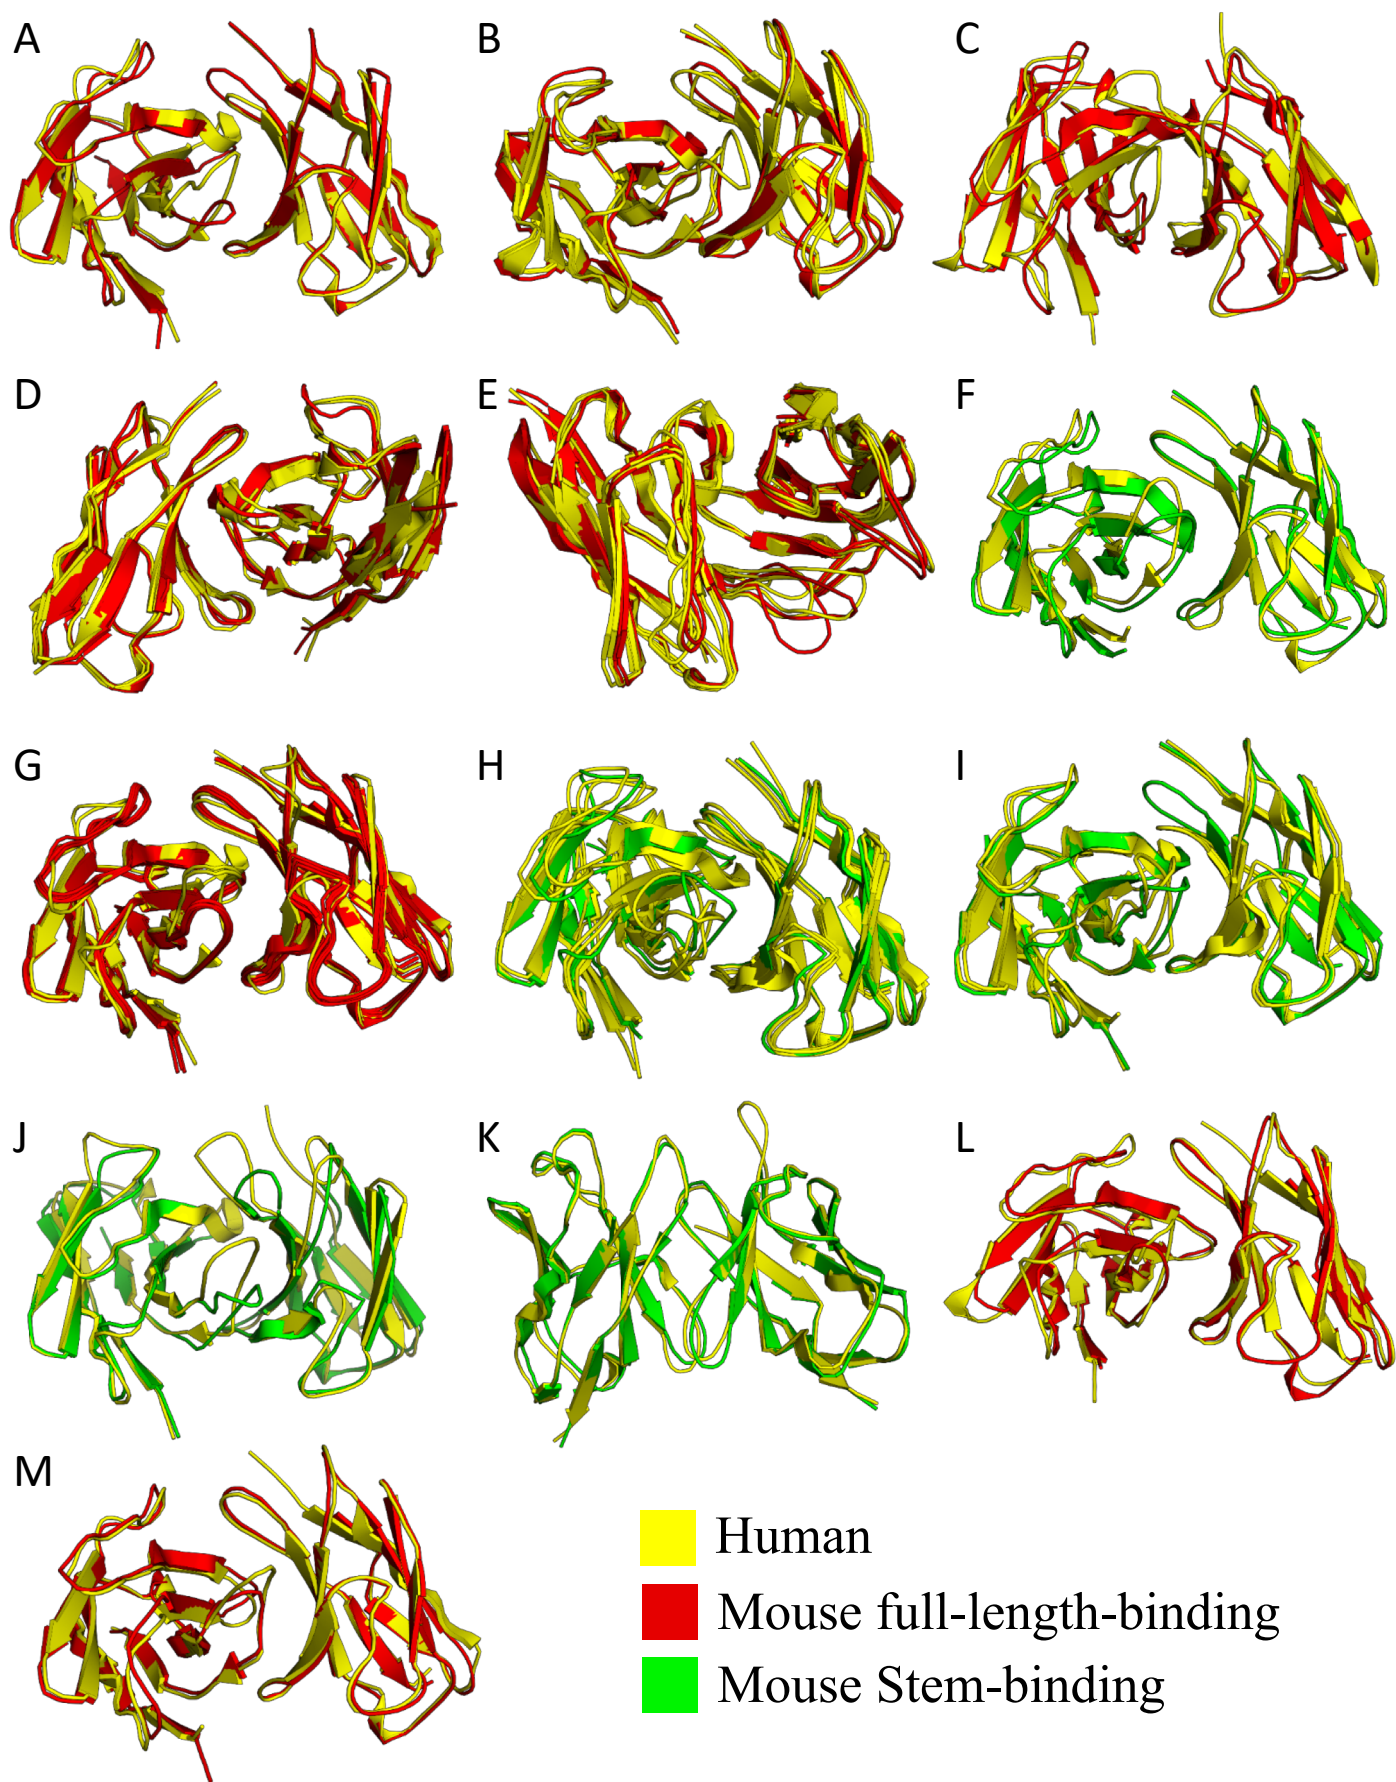

**Suppl Fig. 6. Visualization of structures of clusters composed of human and mouse BCRs obtained post flu vaccination.** The label of each illustration is consistent with the cluster label in Fig.6. The structures of human, mouse stem-binding and mouse full-length-binding BCRs were showed as yellow, red and green, respectively.
